# Supplementary material for: Dietitians and Nutritionists: Stigma in the Context of Obesity. A Systematic Review
Source: PLOS journal article supplement (doi:10.1371/journal.pone.0140276), 2015-10-14

## PRISMA Flowchart

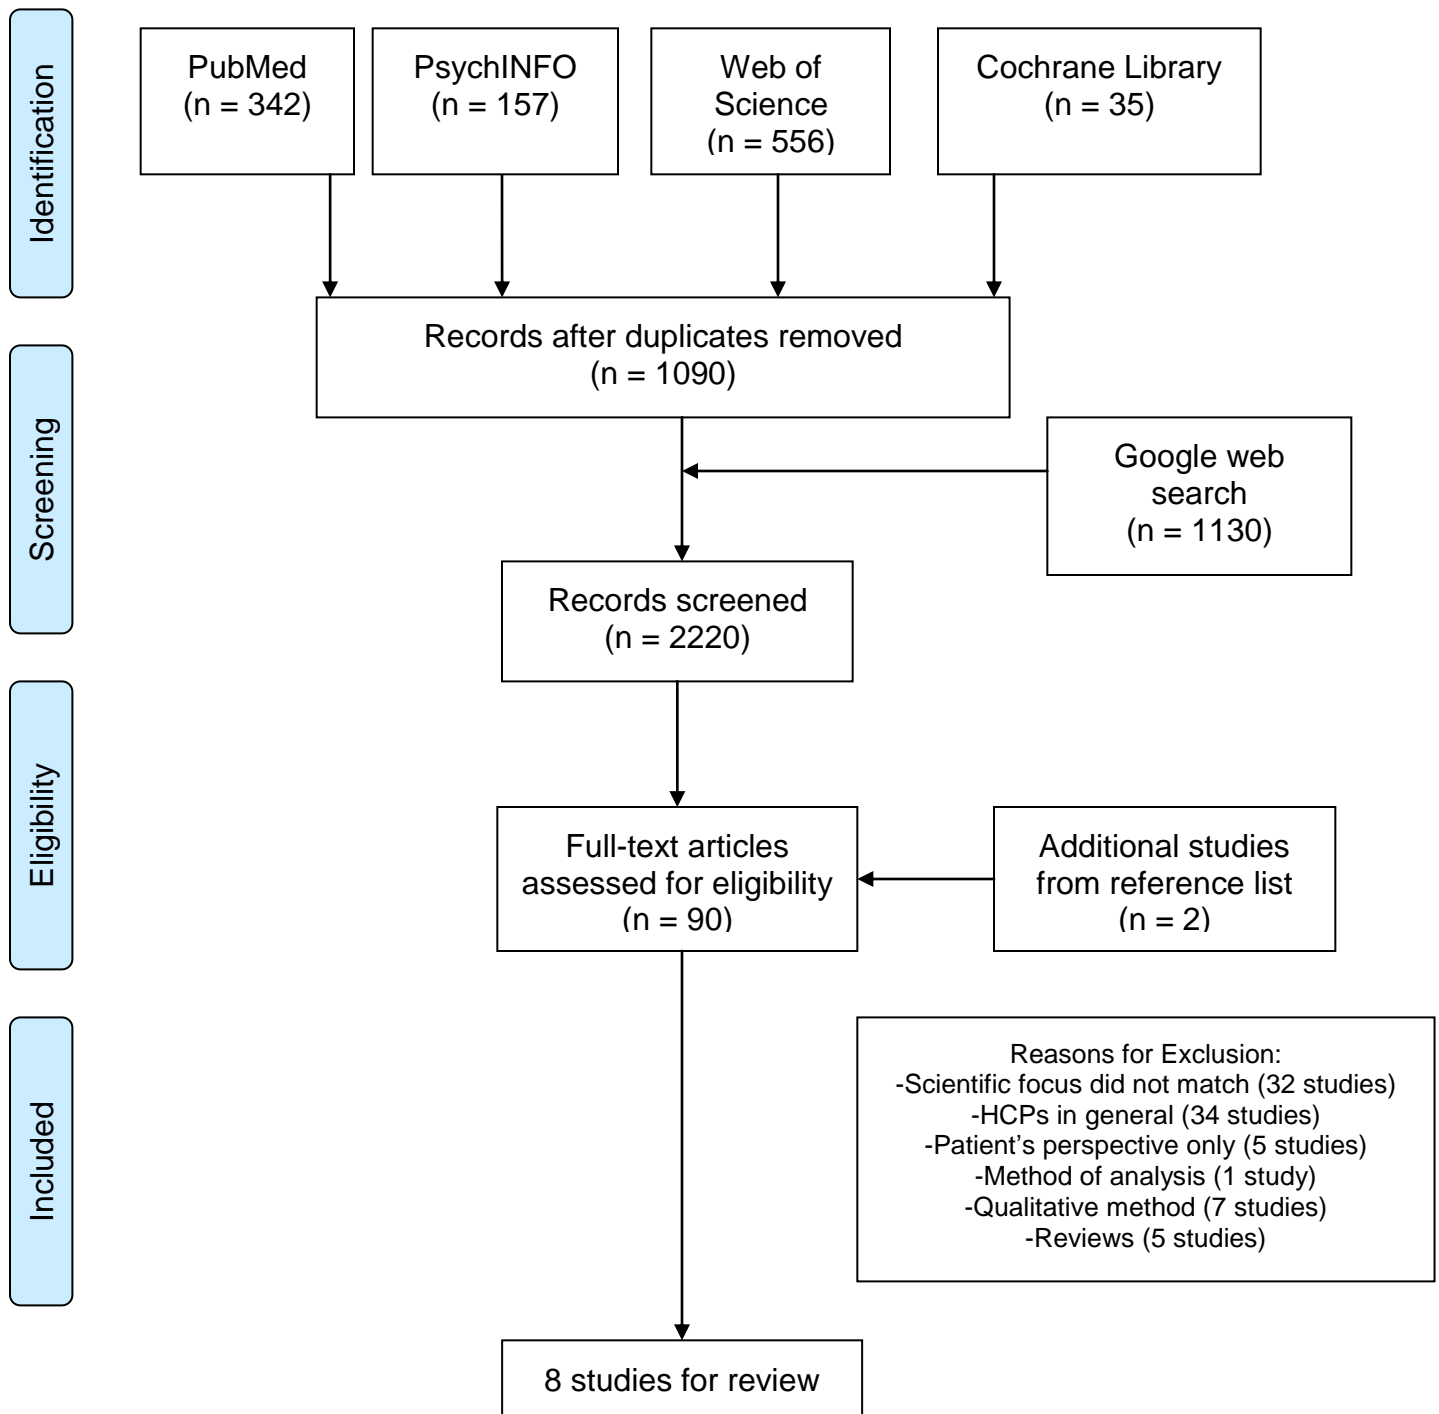

Supplement: S1 (10.1371/journal.pone.0140276.s001) [file journal.pone.0140276.s001]
